# Supplementary material for: Comorbid Depression and Substance Abuse Among Safety-Net Clients in Los Angeles: A Community Participatory Study
Source: Atypon-hosted journal article supplement (doi:10.1176/appi.ps.201300318), 2014-12-17
Supplement: appi.ps.201300318.ds001.pdf [file appi.ps.201300318.ds001.pdf]

# Supplementary Appendices for

## Comorbid Depression and Substance Abuse in Safety-net Clients in Los Angeles: A Community Participatory Assessment

| Table of Contents |              | Page |
|-------------------|--------------|------|
| 1                 | Summary      | 2    |
| 2                 | Appendix A   | 4    |
| 3                 | Appendix B   | 9    |
| 4                 | Appendix C   | 14   |
| 5                 | Trial figure | 19   |

## **1. Summary of the sensitivity analyses**

Appendix A. Individuals screened from substance abuse agencies with individuals screened from other sectors with or without recent substance abuse history, defined as substance abuse/dependence by MINI or in residential treatment in the last six months (Tables A1-A3):

Depressed clients varied significantly different across all three groups in age. Individuals screened from substance abuse sectors had similar PCS-12, were equally likely to misuse drugs or visit primary care, and were less likely to have a 12-month depressive disorder or to have an alcohol use disorder as those screened from other sectors with substance abuse history. Those screened from other sectors with substance abuse history were equally likely to be uninsured, visit mental health with similar frequencies, as those without substance abuse history. All other findings were similar.

Appendix B. Individuals screened from substance abuse agencies with individuals screened from health care agencies (primary care and mental health clinics) with or without a recent substance abuse history, defined as substance abuse/dependence by MINI or receiving substance abuse services in the prior 6 months from an outpatient substance abuse agency self-help group or residential treatment program (Tables B1-B3):

Those screened from other sectors with substance abuse history visited mental health with similar frequencies, were more likely to have a depression-related visit to religious places, and equally likely to visit faith-based sectors or have a depression-related visit to parks or community services, as those without substance abuse history. All other findings were similar.

Appendix C. Individuals screened from substance abuse agencies with individuals screened from social community agencies (social services, faith-based agencies, parks, and community centers) with or without a recent substance abuse history, defined as substance abuse/dependence by MINI or receiving substance abuse services in the prior 6 months from an outpatient substance abuse agency self-help group or residential treatment program (Tables C1-C3):

Depressed clients varied significantly different across all three groups in age but were similar in race/ethnicity. Individuals screened from substance abuse sectors were less likely to be employed, equally likely to misuse drugs, equally likely to visit primary care and mental health and social services agencies, and equally likely to receive medication or counseling from mental health specialty and have a depression-related visit to parks or community centers. Those screened from other sectors with substance abuse history were equally likely to be uninsured or

have anxiety disorder, smoked similar number of cigarettes, rated general health similarly but had lower MCS-12, visited mental health with similar frequencies, more likely to visit emergency rooms for any reason, and equally likely to visit social services or religious places, visit mental health and primary care with similar frequencies, and have depression-related visits to primary care as those without substance abuse history. All other findings were similar.

## Appendix A. Substance abuse status version 2

Analyses used the second version of substance abuse status, comparing individuals screened from substance abuse agencies with individuals screened from other sectors with or without a recent substance abuse history defined as substance abuse or substance dependence by MINI or in residential treatment in the last six months.

**Table A1. Demographic characteristics of clients screened with depressive symptoms, by substance abuse status (version 2)**

| Characteristic                 | Overall<br>(N=957) |                     | Clients from<br>substance abuse<br>agencies<br>(N=217) |                     | Clients from other<br>sectors with<br>substance abuse<br>history<br>(N=208) |                     | Clients from other<br>sectors without<br>substance abuse<br>history<br>(N=532) |                     | P <sup>†</sup> |
|--------------------------------|--------------------|---------------------|--------------------------------------------------------|---------------------|-----------------------------------------------------------------------------|---------------------|--------------------------------------------------------------------------------|---------------------|----------------|
|                                | No.                | Weighted<br>Mean, % | No.                                                    | Weighted<br>Mean, % | No.                                                                         | Weighted<br>Mean, % | No.                                                                            | Weighted<br>Mean, % |                |
| Age (M±SD)                     |                    | 45.8 ± 12.8         |                                                        | 42.5 ± 12.0         |                                                                             | 45.5 ± 11.7         |                                                                                | 47.2 ± 13.2         | .049           |
| Female                         | 560                | 57                  | 101                                                    | 46                  | 95                                                                          | 44                  | 364                                                                            | 66                  | <.001          |
| Married or living with partner | 216                | 23                  | 49                                                     | 23                  | 27                                                                          | 12                  | 140                                                                            | 26                  | .011           |
| Race/Ethnicity                 |                    |                     |                                                        |                     |                                                                             |                     |                                                                                |                     | .001           |
| Hispanic                       | 386                | 41                  | 67                                                     | 32                  | 62                                                                          | 30                  | 257                                                                            | 49                  |                |
| Black or African American      | 456                | 46                  | 126                                                    | 57                  | 119                                                                         | 55                  | 211                                                                            | 38                  |                |
| Non-Hispanic white             | 83                 | 9                   | 16                                                     | 8                   | 22                                                                          | 12                  | 45                                                                             | 9                   |                |
| Other (API/Native/other)       | 32                 | 4                   | 8                                                      | 4                   | 5                                                                           | 3                   | 19                                                                             | 4                   |                |
| Less than high school          | 423                | 44                  | 88                                                     | 40                  | 73                                                                          | 35                  | 262                                                                            | 49                  | .005           |
| Born US                        | 680                | 70                  | 189                                                    | 87                  | 176                                                                         | 85                  | 315                                                                            | 58                  | <.001          |
| Income under poverty level     | 706                | 74                  | 162                                                    | 75                  | 156                                                                         | 75                  | 388                                                                            | 73                  | ns             |

*Note.* Data were multiply imputed at item level and percentage and means were weighted for eligible sample for enrollment and survey response. Percentages may not add up to 100% due to rounding.

<sup>†</sup>The statistics were based on Wald Chi-square test for comparing differences across three categories account for clustering (clients within programs). There was 2 degree of freedom for all of the characteristics listed with the exception of race/ethnicity, which had 6 degrees of freedom.

**Table A2. Social and clinical needs of clients with depressive symptoms, by substance abuse status (version 2) adjusted for age and sex**

| Variables                                                       | Adjusted Estimates                                |             |                                                                     |             |                                                                        |             | Test        |             |
|-----------------------------------------------------------------|---------------------------------------------------|-------------|---------------------------------------------------------------------|-------------|------------------------------------------------------------------------|-------------|-------------|-------------|
|                                                                 | (a) Clients from substance abuse agencies (n=217) |             | (b) Clients from other sectors with substance abuse history (n=208) |             | (c) Clients from other sectors without substance abuse history (n=532) |             | (b) vs. (a) | (c) vs. (b) |
|                                                                 | Estimate                                          | 95% CI      | Estimate                                                            | 95% CI      | Estimate                                                               | 95% CI      | P           | P           |
| <i>Social needs</i>                                             |                                                   |             |                                                                     |             |                                                                        |             |             |             |
| Has health insurance, %                                         | 34.6                                              | 22.0 - 47.2 | 43.3                                                                | 33.2 - 53.3 | 51.1                                                                   | 44.0 - 58.2 | ns          | ns          |
| Homeless, %                                                     | 9.0                                               | 3.7 - 14.2  | 28.2                                                                | 16.5 - 39.9 | 17.5                                                                   | 10.1 - 24.8 | .002        | .009        |
| Currently employed, %                                           | 10.1                                              | 5.8 - 14.4  | 15.2                                                                | 9.1 - 21.4  | 25.7                                                                   | 20.6 - 30.8 | ns          | .002        |
| Arrested or on probation at any time past 6 mo., %              | 42.4                                              | 33.5 - 51.2 | 21.7                                                                | 13.5 - 29.9 | 8.5                                                                    | 5.4 - 11.7  | .002        | <.001       |
| Evicted or had your house foreclosed past 6 mo., %              | 21.2                                              | 13.9 - 28.5 | 12.9                                                                | 6.9 - 18.9  | 13.4                                                                   | 10.0 - 16.8 | ns          | ns          |
| Witnessed someone being beaten, abused, or killed past 6 mo., % | 19.3                                              | 13.1 - 25.4 | 19.5                                                                | 14.1 - 24.9 | 12.7                                                                   | 9.2 - 16.2  | ns          | .032        |
| Lost custody of any children in the past 6 mo., %               | 9.1                                               | 4.6 - 13.6  | 4.7                                                                 | .6 - 8.7    | 1.8                                                                    | .7 - 2.8    | ns          | ns          |
| <i>Clinical characteristics</i>                                 |                                                   |             |                                                                     |             |                                                                        |             |             |             |
| PHQ-8 score, mean                                               | 15.2                                              | 14.6 - 15.9 | 15.5                                                                | 14.9 - 16.2 | 14.9                                                                   | 14.4 - 15.4 | ns          | ns          |
| Number of chronic conditions (from list of 18), mean            | 3.1                                               | 2.6 - 3.6   | 3.3                                                                 | 2.9 - 3.7   | 3.5                                                                    | 3.2 - 3.9   | ns          | ns          |
| # cigarettes smoked per day last 7 days, mean                   | 6.9                                               | 5.3 - 8.5   | 6.4                                                                 | 5.1 - 7.7   | 3.8                                                                    | 2.8 - 4.9   | ns          | <.001       |
| <i>Quality of life and Function scores</i>                      |                                                   |             |                                                                     |             |                                                                        |             |             |             |
| General health, mean                                            | 3.4                                               | 3.2 - 3.6   | 3.4                                                                 | 3.3 - 3.6   | 3.7                                                                    | 3.6 - 3.8   | ns          | <.001       |
| PCS-12, mean                                                    | 40.4                                              | 39.4 - 41.4 | 39.2                                                                | 38.1 - 40.3 | 38.8                                                                   | 38.1 - 39.6 | ns          | ns          |
| MCS-12, mean                                                    | 39.0                                              | 38.1 - 39.9 | 38.6                                                                | 37.8 - 39.5 | 39.5                                                                   | 38.8 - 40.3 | ns          | ns          |
| <i>Probable mental health diagnosis</i>                         |                                                   |             |                                                                     |             |                                                                        |             |             |             |
| Current major depressive episode or dysthymia <sup>‡</sup> , %  | 53.6                                              | 45.3 - 61.8 | 62.7                                                                | 56.7 - 68.8 | 47.5                                                                   | 41.5 - 53.5 | ns          | <.001       |
| 12-month depressive disorder <sup>‡</sup> , %                   | 64.5                                              | 57.4 - 71.6 | 74.2                                                                | 67.8 - 80.7 | 56.7                                                                   | 50.6 - 62.9 | .049        | <.001       |
| Lifetime psychosis or mania <sup>#</sup> , %                    | 54.4                                              | 46.6 - 62.3 | 52.6                                                                | 44.1 - 61.0 | 31.1                                                                   | 23.5 - 38.8 | ns          | <.001       |
| Any current or recent anxiety disorder <sup>†‡</sup> , %        | 55.5                                              | 50.0 - 61.1 | 59.2                                                                | 50.7 - 67.8 | 40.1                                                                   | 33.8 - 46.4 | ns          | <.001       |
| <i>Probable substance abuse diagnosis</i>                       |                                                   |             |                                                                     |             |                                                                        |             |             |             |
| Misused any drugs in past 12 mo. <sup>‡</sup> , %               | 66.7                                              | 59.3 - 74.2 | 67.2                                                                | 58.4 - 76.0 | 9.5                                                                    | 6.4 - 12.6  | ns          | <.001       |

**Table A2. Social and clinical needs of clients with depressive symptoms, by substance abuse status (version 2) adjusted for age and sex**

| Variables                                                   | Adjusted Estimates                                |             |                                                                     |             |                                                                        |             | Test        |             |
|-------------------------------------------------------------|---------------------------------------------------|-------------|---------------------------------------------------------------------|-------------|------------------------------------------------------------------------|-------------|-------------|-------------|
|                                                             | (a) Clients from substance abuse agencies (n=217) |             | (b) Clients from other sectors with substance abuse history (n=208) |             | (c) Clients from other sectors without substance abuse history (n=532) |             | (b) vs. (a) | (c) vs. (b) |
|                                                             | Estimate                                          | 95% CI      | Estimate                                                            | 95% CI      | Estimate                                                               | 95% CI      | P           | P           |
| AUDIT-C score (alcohol screen for hazardous drinkers), mean | 2.4                                               | 1.9 - 2.9   | 2.7                                                                 | 2.2 - 3.2   | 1.1                                                                    | .9 - 1.4    | ns          | <.001       |
| Hazardous drinker or alcohol use disorder <sup>§</sup> , %  | 29.4                                              | 24.3 - 34.5 | 39.9                                                                | 31.1 - 48.7 | 14.6                                                                   | 10.9 - 18.3 | .036        | <.001       |

*Note:* adjusted analyses used multiply imputed data and weighted for eligible sample for enrollment and survey response; logistic regression models for binary variables or linear regression models for continuous variables adjusted for age and sex and accounted for clustering (clients within programs).

<sup>†</sup>Panic attacks, Post-Traumatic Stress Disorder, Social Anxiety Disorder. <sup>‡</sup>Based on Mini International Neuropsychiatric Interview. <sup>§</sup>Based on a positive AUDIT-C score, male AUDIT-C $\geq$ 4, female $\geq$ 3. <sup>#</sup>derived from MINI and from baseline client interview.

**Table A3. Past six-month utilization of health services (emergency room, hospitalization, mental health, primary care, substance abuse, social services, faith-based, parks and community centers) among clients with depressive symptoms, by substance abuse status (version 2) adjusted for age and sex**

| Variables                                                                                               | Adjusted Estimates                        |             |                                                             |             |                                                                |             | Test        |             |
|---------------------------------------------------------------------------------------------------------|-------------------------------------------|-------------|-------------------------------------------------------------|-------------|----------------------------------------------------------------|-------------|-------------|-------------|
|                                                                                                         | (a) Clients from substance abuse agencies |             | (b) Clients from other sectors with substance abuse history |             | (c) Clients from other sectors without substance abuse history |             | (b) vs. (a) | (c) vs. (b) |
|                                                                                                         | Estimate                                  | 95% CI      | Estimate                                                    | 95% CI      | Estimate                                                       | 95% CI      | P           | P           |
| <i>Emergency room visits</i>                                                                            |                                           |             |                                                             |             |                                                                |             |             |             |
| Any emergency room visits for any health problems in the past 6 mo., %                                  | 59.1                                      | 50.4 - 67.8 | 53.8                                                        | 46.9 - 60.8 | 47.0                                                           | 41.6 - 52.4 | ns          | ns          |
| # of emergency room visits for any health problems in the past 6 mo., among visited (N=488), mean       | 3.7                                       | 2.8 - 4.7   | 3.5                                                         | 2.7 - 4.4   | 3.2                                                            | 2.8 - 3.6   | ns          | ns          |
| Any emergency room visits for alcohol, drug, or mental/emotional problem in the past 6 mo., %           | 35.8                                      | 28.9 - 42.6 | 36.7                                                        | 29.7 - 43.8 | 19.8                                                           | 15.5 - 24.1 | ns          | <.001       |
| # of emergency room visits for alcohol, drug, or mental/emotional problems, among visited (N=259), mean | 3.1                                       | 2.4 - 3.7   | 3.0                                                         | 2.3 - 3.7   | 2.8                                                            | 2.2 - 3.3   | ns          | ns          |
| <i>Hospitalizations and length of stay for alcohol, drug, or mental/emotional problem</i>               |                                           |             |                                                             |             |                                                                |             |             |             |
| Any overnight stay in hospital for alcohol, drug, or mental/emotional problem in the past 6 mo., %      | 20.8                                      | 13.8 - 27.9 | 23.9                                                        | 18.0 - 29.8 | 7.6                                                            | 5.1 - 10.2  | ns          | <.001       |
| # of nights stay for alcohol, drug, or mental/emotional problem past 6 mo, among visited (N=134), mean  | 10.6                                      | 3.0 - 18.3  | 9.5                                                         | 6.3 - 12.7  | 10.1                                                           | 6.1 - 14.2  | ns          | ns          |
| <i>Mental Health Specialty Visit</i>                                                                    |                                           |             |                                                             |             |                                                                |             |             |             |
| Any mental health specialty in the past 6 mo., %                                                        | 56.3                                      | 49.2 - 63.5 | 71.5                                                        | 62.4 - 80.6 | 52.4                                                           | 43.2 - 61.6 | .014        | <.001       |
| # of mental health outpatient visits, among visited (N=554), mean                                       | 16.5                                      | 11.3 - 21.7 | 13.6                                                        | 10.5 - 16.7 | 11.7                                                           | 9.6 - 13.9  | ns          | ns          |
| Any medication or counseling for emotional or mental health problem in the past 6 mo., %                | 55.3                                      | 48.3 - 62.3 | 68.9                                                        | 59.2 - 78.7 | 47.9                                                           | 39.0 - 56.9 | .032        | <.001       |
| <i>Primary care visit</i>                                                                               |                                           |             |                                                             |             |                                                                |             |             |             |
| Any primary care visit for any problem in the past 6 mo., %                                             | 58.6                                      | 48.2 - 69.0 | 70.0                                                        | 61.7 - 78.2 | 73.6                                                           | 69.6 - 77.6 | ns          | ns          |
| # of visits to primary care provider in the past 6 mo., among visited (N=659), mean                     | 7.2                                       | 3.6 - 10.8  | 6.9                                                         | 5.6 - 8.2   | 5.2                                                            | 4.6 - 5.8   | ns          | .017        |

**Table A3. Past six-month utilization of health services (emergency room, hospitalization, mental health, primary care, substance abuse, social services, faith-based, parks and community centers) among clients with depressive symptoms, by substance abuse status (version 2) adjusted for age and sex**

| Variables                                                                                                         | Adjusted Estimates                        |             |                                                             |             |                                                                |             | Test        |             |
|-------------------------------------------------------------------------------------------------------------------|-------------------------------------------|-------------|-------------------------------------------------------------|-------------|----------------------------------------------------------------|-------------|-------------|-------------|
|                                                                                                                   | (a) Clients from substance abuse agencies |             | (b) Clients from other sectors with substance abuse history |             | (c) Clients from other sectors without substance abuse history |             | (b) vs. (a) | (c) vs. (b) |
|                                                                                                                   | Estimate                                  | 95% CI      | Estimate                                                    | 95% CI      | Estimate                                                       | 95% CI      | P           | P           |
| Any primary care visits that included a service for depression, among visited (N=659), %                          | 59.5                                      | 49.7 - 69.2 | 69.8                                                        | 61.6 - 78.0 | 57.2                                                           | 50.0 - 64.5 | ns          | .02         |
| <i>Social services agency visit</i>                                                                               |                                           |             |                                                             |             |                                                                |             |             |             |
| Any social services visit in the past 6 mo., %                                                                    | 53.0                                      | 47.1 - 58.9 | 67.0                                                        | 58.3 - 75.8 | 50.7                                                           | 44.5 - 56.8 | .014        | <.001       |
| Any visits to social services agency that included a service for depression, among visited (N=522), %             | 47.3                                      | 36.3 - 58.3 | 62.8                                                        | 55.4 - 70.3 | 47.6                                                           | 40.2 - 55.0 | .023        | .009        |
| <i>Faith-based visit (e.g., church, temple)</i>                                                                   |                                           |             |                                                             |             |                                                                |             |             |             |
| Any faith-based visit in the past 6 mo., %                                                                        | 54.9                                      | 43.7 - 66.1 | 53.8                                                        | 45.8 - 61.8 | 63.3                                                           | 58.9 - 67.7 | ns          | .038        |
| Any visits to religious places that included a service for depression in the past 6 mo., among visited (N=568), % | 46.2                                      | 34.8 - 57.5 | 42.1                                                        | 30.8 - 53.4 | 34.8                                                           | 28.7 - 40.8 | ns          | ns          |
| <i>Parks and community center (including senior centers) visits</i>                                               |                                           |             |                                                             |             |                                                                |             |             |             |
| Any parks or community center visit in the past 6 mo., %                                                          | 48.3                                      | 43.7 - 53.0 | 46.4                                                        | 38.5 - 54.2 | 48.1                                                           | 43.1 - 53.2 | ns          | ns          |
| Any visits to parks or community centers that included a service for depression, among visited (N=462), %         | 11.7                                      | 7.4 - 16.0  | 24.8                                                        | 15.7 - 34.0 | 13.9                                                           | 9.1 - 18.8  | .005        | .028        |

*Note:* adjusted analyses used multiply imputed data and weighted for eligible sample for enrollment and survey response; logistic regression models for binary variables or log-linear regression models for count variables adjusted for age and sex and accounted for clustering (clients within programs).



**Appendix B. Stratified analysis of substance abuse history version 1 - data limited to clients screened from substance abuse or health care agencies**

Analyses used substance abuse status version 1, compared individuals screened from substance abuse agencies with individuals screened from health care agencies (primary care and mental health clinics) with or without a recent substance abuse history defined as substance abuse or substance dependence by MINI or receiving substance abuse services in the prior 6 months from an outpatient substance abuse agency self-help group or residential treatment program.

**Table B1. Demographic characteristics of clients screened with depressive symptoms, by substance abuse status (version 1)**

| Characteristic                   | Overall<br>(N=671) |                     | Clients from<br>substance abuse<br>agencies<br>(N=217) |                     | Clients from<br>health care<br>agencies with<br>substance abuse<br>history<br>(N=170) |                     | Clients from<br>health care<br>agencies<br>without<br>substance<br>abuse history<br>(N=284) |                     | P <sup>†</sup> |
|----------------------------------|--------------------|---------------------|--------------------------------------------------------|---------------------|---------------------------------------------------------------------------------------|---------------------|---------------------------------------------------------------------------------------------|---------------------|----------------|
|                                  | No.                | Weighted<br>Mean, % | No.                                                    | Weighted<br>Mean, % | No.                                                                                   | Weighted<br>Mean, % | No.                                                                                         | Weighted<br>Mean, % |                |
| Age (M±SD)                       |                    | 44.3 ± 12.1         |                                                        | 42.5 ± 12.0         |                                                                                       | 43.8 ± 10.4         |                                                                                             | 45.8 ± 12.8         | ns             |
| Female                           | 374                | 54                  | 101                                                    | 46                  | 73                                                                                    | 41                  | 200                                                                                         | 68                  | <.001          |
| Married or living with a partner | 160                | 24                  | 49                                                     | 23                  | 24                                                                                    | 14                  | 87                                                                                          | 30                  | .015           |
| Race/Ethnicity                   |                    |                     |                                                        |                     |                                                                                       |                     |                                                                                             |                     | <.001          |
| Hispanic                         | 292                | 44                  | 67                                                     | 32                  | 56                                                                                    | 33                  | 169                                                                                         | 61                  |                |
| Black or African American        | 312                | 45                  | 126                                                    | 57                  | 92                                                                                    | 52                  | 94                                                                                          | 32                  |                |
| Non-Hispanic white               | 43                 | 7                   | 16                                                     | 8                   | 15                                                                                    | 10                  | 12                                                                                          | 5                   |                |
| Other (API/Native/other)         | 24                 | 4                   | 8                                                      | 4                   | 7                                                                                     | 5                   | 9                                                                                           | 3                   |                |
| Less than high school            | 321                | 48                  | 88                                                     | 40                  | 74                                                                                    | 43                  | 158                                                                                         | 56                  | .004           |
| Born US                          | 475                | 70                  | 189                                                    | 87                  | 143                                                                                   | 84                  | 143                                                                                         | 49                  | <.001          |
| Income under poverty level       | 504                | 75                  | 162                                                    | 75                  | 131                                                                                   | 77                  | 210                                                                                         | 74                  | ns             |

*Note.* Data were multiply imputed at item level and percentage and means were weighted for eligible sample for enrollment and survey response. Percentages may not add up to 100% due to rounding.

<sup>†</sup>The statistics were based on Wald Chi-square test for comparing differences across three categories account for clustering (clients within programs). There was 2 degree of freedom for all of the characteristics listed with the exception of race/ethnicity, which had 6 degrees of freedom.

**Table B2. Social and clinical needs of clients with depressive symptoms, by substance abuse status (version 1) adjusted for age and sex**

| Variables                                                       | Adjusted Estimates                                |             |                                                                            |             |                                                                               |             | Test        |             |
|-----------------------------------------------------------------|---------------------------------------------------|-------------|----------------------------------------------------------------------------|-------------|-------------------------------------------------------------------------------|-------------|-------------|-------------|
|                                                                 | (a) Clients from substance abuse agencies (n=217) |             | (b) Clients from health care agencies with substance abuse history (n=170) |             | (c) Clients from health care agencies without substance abuse history (n=284) |             | (b) vs. (a) | (c) vs. (b) |
|                                                                 | Estimate                                          | 95% CI      | Estimate                                                                   | 95% CI      | Estimate                                                                      | 95% CI      | P           | P           |
| <i>Social needs</i>                                             |                                                   |             |                                                                            |             |                                                                               |             |             |             |
| Has health insurance, %                                         | 33.4                                              | 20.7 - 46.0 | 40.2                                                                       | 29.4 - 51.0 | 51.7                                                                          | 42.6 - 60.8 | ns          | .008        |
| Homeless, %                                                     | 9.2                                               | 3.8 - 14.6  | 25.1                                                                       | 12.3 - 38.0 | 16.7                                                                          | 8.2 - 25.2  | .012        | ns          |
| Currently employed, %                                           | 10.0                                              | 5.7 - 14.3  | 12.4                                                                       | 6.1 - 18.7  | 26.8                                                                          | 20.1 - 33.6 | ns          | <.001       |
| Arrested or on probation at any time past 6 mo., %              | 43.5                                              | 34.6 - 52.4 | 20.0                                                                       | 10.3 - 29.7 | 6.3                                                                           | 2.5 - 10.1  | .002        | .009        |
| Evicted or had your house foreclosed past 6 mo., %              | 21.7                                              | 14.2 - 29.1 | 13.7                                                                       | 7.0 - 20.4  | 14.0                                                                          | 8.9 - 19.0  | ns          | ns          |
| Witnessed someone being beaten, abused, or killed past 6 mo., % | 19.8                                              | 13.5 - 26.2 | 21.5                                                                       | 14.8 - 28.2 | 11.9                                                                          | 7.0 - 16.8  | ns          | .033        |
| Lost custody of any children in the past 6 mo., %               | 9.5                                               | 4.8 - 14.2  | 4.4                                                                        | -.2 - 9.0   | 2.3                                                                           | .7 - 4.0    | ns          | ns          |
| <i>Clinical characteristics</i>                                 |                                                   |             |                                                                            |             |                                                                               |             |             |             |
| PHQ-8 score, mean                                               | 15.2                                              | 14.6 - 15.9 | 15.6                                                                       | 14.8 - 16.3 | 15.0                                                                          | 14.4 - 15.7 | ns          | ns          |
| Number of chronic conditions (from list of 18), mean            | 3.1                                               | 2.5 - 3.6   | 3.4                                                                        | 3.0 - 3.9   | 3.4                                                                           | 2.8 - 3.9   | ns          | ns          |
| # cigarettes smoked per day last 7 days, mean                   | 7.0                                               | 5.4 - 8.6   | 6.7                                                                        | 5.2 - 8.3   | 2.6                                                                           | 1.5 - 3.8   | ns          | <.001       |
| <i>Quality of life and Function scores</i>                      |                                                   |             |                                                                            |             |                                                                               |             |             |             |
| General health, mean                                            | 3.4                                               | 3.2 - 3.6   | 3.5                                                                        | 3.4 - 3.6   | 3.8                                                                           | 3.6 - 3.9   | ns          | .002        |
| PCS-12, mean                                                    | 40.5                                              | 39.5 - 41.5 | 38.7                                                                       | 37.4 - 40.0 | 39.0                                                                          | 37.9 - 40.1 | .017        | ns          |
| MCS-12, mean                                                    | 38.9                                              | 38.0 - 39.9 | 39.0                                                                       | 38.1 - 39.9 | 39.1                                                                          | 38.0 - 40.2 | ns          | ns          |
| <i>Probable mental health diagnosis</i>                         |                                                   |             |                                                                            |             |                                                                               |             |             |             |
| Current major depressive episode or dysthymia <sup>†</sup> , %  | 54.9                                              | 46.9 - 62.9 | 64.1                                                                       | 56.7 - 71.5 | 46.3                                                                          | 38.0 - 54.6 | ns          | <.001       |
| 12-month depressive disorder <sup>†</sup> , %                   | 65.7                                              | 58.9 - 72.5 | 73.9                                                                       | 65.8 - 82.0 | 57.6                                                                          | 49.3 - 66.0 | ns          | <.001       |
| Lifetime psychosis or mania <sup>#</sup> , %                    | 55.0                                              | 47.0 - 63.1 | 55.6                                                                       | 46.3 - 64.9 | 27.9                                                                          | 17.1 - 38.8 | ns          | <.001       |
| Any current or recent anxiety disorder <sup>††</sup> , %        | 56.2                                              | 50.7 - 61.8 | 62.5                                                                       | 52.0 - 73.0 | 40.4                                                                          | 32.8 - 47.9 | ns          | <.001       |
| <i>Probable substance abuse diagnosis</i>                       |                                                   |             |                                                                            |             |                                                                               |             |             |             |
| Misused any drugs in past 12 mo. <sup>‡</sup> , %               | 67.7                                              | 60.4 - 75.1 | 53.7                                                                       | 44.9 - 62.4 | 10.9                                                                          | 6.3 - 15.5  | .019        | <.001       |

**Table B2. Social and clinical needs of clients with depressive symptoms, by substance abuse status (version 1) adjusted for age and sex**

| Variables                                                   | Adjusted Estimates                                |             |                                                                            |             |                                                                               |            | Test        |             |
|-------------------------------------------------------------|---------------------------------------------------|-------------|----------------------------------------------------------------------------|-------------|-------------------------------------------------------------------------------|------------|-------------|-------------|
|                                                             | (a) Clients from substance abuse agencies (n=217) |             | (b) Clients from health care agencies with substance abuse history (n=170) |             | (c) Clients from health care agencies without substance abuse history (n=284) |            | (b) vs. (a) | (c) vs. (b) |
|                                                             | Estimate                                          | 95% CI      | Estimate                                                                   | 95% CI      | Estimate                                                                      | 95% CI     | P           | P           |
| AUDIT-C score (alcohol screen for hazardous drinkers), mean | 2.4                                               | 2.0 - 2.9   | 2.2                                                                        | 1.6 - 2.7   | 1.2                                                                           | .8 - 1.5   | ns          | .006        |
| Hazardous drinker or alcohol use disorder <sup>§</sup> , %  | 30.0                                              | 24.9 - 35.2 | 32.3                                                                       | 23.7 - 41.0 | 14.8                                                                          | 9.6 - 20.0 | ns          | .002        |

*Note:* adjusted analyses used multiply imputed data and weighted for eligible sample for enrollment and survey response; logistic regression models for binary variables or linear regression models for continuous variables adjusted for age and sex and accounted for clustering (clients within programs).

<sup>†</sup>Panic attacks, Post-Traumatic Stress Disorder, Social Anxiety Disorder. <sup>‡</sup>Based on Mini International Neuropsychiatric Interview. <sup>§</sup>Based on a positive AUDIT-C score, male AUDIT-C $\geq$ 4, female $\geq$ 3. <sup>#</sup>derived from MINI and from baseline client interview.

**Table B3. Past six-month utilization of health services (emergency room, hospitalization, mental health, primary care, substance abuse, social services, faith-based, parks and community centers) among clients with depressive symptoms, by substance abuse status (version 1) adjusted for age and sex**

| Variables                                                                                               | Adjusted Estimates                        |             |                                                                    |             |                                                                       |             | Test        |             |
|---------------------------------------------------------------------------------------------------------|-------------------------------------------|-------------|--------------------------------------------------------------------|-------------|-----------------------------------------------------------------------|-------------|-------------|-------------|
|                                                                                                         | (a) Clients from substance abuse agencies |             | (b) Clients from health care agencies with substance abuse history |             | (c) Clients from health care agencies without substance abuse history |             | (b) vs. (a) | (c) vs. (b) |
|                                                                                                         | Estimate                                  | 95% CI      | Estimate                                                           | 95% CI      | Estimate                                                              | 95% CI      | P           | P           |
| <i>Emergency room visits</i>                                                                            |                                           |             |                                                                    |             |                                                                       |             |             |             |
| Any emergency room visits for any health problems in the past 6 mo., %                                  | 59.5                                      | 51.0 - 68.1 | 51.1                                                               | 43.8 - 58.3 | 47.7                                                                  | 40.0 - 55.3 | ns          | ns          |
| # of emergency room visits for any health problems in the past 6 mo., among visited (N=349), mean       | 3.8                                       | 2.9 - 4.7   | 3.4                                                                | 2.4 - 4.5   | 3.3                                                                   | 2.6 - 4.1   | ns          | ns          |
| Any emergency room visits for alcohol, drug, or mental/emotional problem in the past 6 mo., %           | 36.3                                      | 29.5 - 43.1 | 35.4                                                               | 27.6 - 43.2 | 20.0                                                                  | 14.0 - 26.1 | ns          | <.001       |
| # of emergency room visits for alcohol, drug, or mental/emotional problems, among visited (N=193), mean | 3.1                                       | 2.4 - 3.7   | 2.9                                                                | 2.1 - 3.6   | 3.0                                                                   | 2.0 - 4.0   | ns          | ns          |
| <i>Hospitalizations and length of stay for alcohol, drug, or mental/emotional problem</i>               |                                           |             |                                                                    |             |                                                                       |             |             |             |
| Any overnight stay in hospital for alcohol, drug, or mental/emotional problem in the past 6 mo., %      | 20.8                                      | 13.9 - 27.7 | 20.2                                                               | 14.7 - 25.6 | 6.7                                                                   | 3.7 - 9.8   | ns          | <.001       |
| # of nights stay for alcohol, drug, or mental/emotional problem past 6 mo., among visited (N=98), mean  | 10.7                                      | 3.2 - 18.2  | 10.4                                                               | 6.7 - 14.2  | 12.1                                                                  | 4.7 - 19.4  | ns          | ns          |
| <i>Mental Health Specialty Visit</i>                                                                    |                                           |             |                                                                    |             |                                                                       |             |             |             |
| Any mental health specialty in the past 6 mo., %                                                        | 57.2                                      | 50.3 - 64.2 | 75.6                                                               | 65.2 - 86.1 | 54.7                                                                  | 42.1 - 67.4 | .009        | .001        |
| # of mental health outpatient visits, among visited (N=412), mean                                       | 16.8                                      | 11.4 - 22.1 | 14.8                                                               | 11.0 - 18.6 | 11.6                                                                  | 9.5 - 13.7  | ns          | ns          |
| Any medication or counseling for emotional or mental health problem in the past 6 mo., %                | 56.2                                      | 49.4 - 63.1 | 72.0                                                               | 60.7 - 83.3 | 50.6                                                                  | 38.1 - 63.0 | .03         | .001        |
| <i>Primary care visit</i>                                                                               |                                           |             |                                                                    |             |                                                                       |             |             |             |
| Any primary care visit for any problem in the past 6 mo., %                                             | 57.8                                      | 47.4 - 68.3 | 74.3                                                               | 64.1 - 84.5 | 73.4                                                                  | 68.0 - 78.9 | .028        | ns          |
| # of visits to primary care provider in the past 6 mo., among visited (N=457), mean                     | 7.3                                       | 3.7 - 11.0  | 7.8                                                                | 6.5 - 9.0   | 4.8                                                                   | 4.1 - 5.5   | ns          | <.001       |

**Table B3. Past six-month utilization of health services (emergency room, hospitalization, mental health, primary care, substance abuse, social services, faith-based, parks and community centers) among clients with depressive symptoms, by substance abuse status (version 1) adjusted for age and sex**

| Variables                                                                                                         | Adjusted Estimates                        |             |                                                                    |             |                                                                       |             | Test        |             |
|-------------------------------------------------------------------------------------------------------------------|-------------------------------------------|-------------|--------------------------------------------------------------------|-------------|-----------------------------------------------------------------------|-------------|-------------|-------------|
|                                                                                                                   | (a) Clients from substance abuse agencies |             | (b) Clients from health care agencies with substance abuse history |             | (c) Clients from health care agencies without substance abuse history |             | (b) vs. (a) | (c) vs. (b) |
|                                                                                                                   | Estimate                                  | 95% CI      | Estimate                                                           | 95% CI      | Estimate                                                              | 95% CI      | P           | P           |
| Any primary care visits that included a service for depression, among visited (N=457), %                          | 59.2                                      | 50.1 - 68.4 | 70.7                                                               | 62.6 - 78.7 | 56.2                                                                  | 44.8 - 67.6 | ns          | .03         |
| <i>Social services agency visit</i>                                                                               |                                           |             |                                                                    |             |                                                                       |             |             |             |
| Any social services visit in the past 6 mo., %                                                                    | 53.6                                      | 47.8 - 59.4 | 66.1                                                               | 55.8 - 76.4 | 44.9                                                                  | 37.5 - 52.3 | .046        | <.001       |
| Any visits to social services agency that included a service for depression, among visited (N=355), %             | 48.2                                      | 37.6 - 58.8 | 62.1                                                               | 55.0 - 69.3 | 45.3                                                                  | 35.5 - 55.2 | .035        | .008        |
| <i>Faith-based visit (e.g., church, temple)</i>                                                                   |                                           |             |                                                                    |             |                                                                       |             |             |             |
| Any faith-based visit in the past 6 mo., %                                                                        | 54.6                                      | 43.2 - 66.0 | 54.5                                                               | 46.8 - 62.2 | 63.5                                                                  | 57.9 - 69.1 | ns          | ns          |
| Any visits to religious places that included a service for depression in the past 6 mo., among visited (N=390), % | 47.2                                      | 35.9 - 58.5 | 45.7                                                               | 34.2 - 57.1 | 31.0                                                                  | 23.5 - 38.5 | ns          | .022        |
| <i>Parks and community center (including senior centers) visits</i>                                               |                                           |             |                                                                    |             |                                                                       |             |             |             |
| Any parks or community center visit in the past 6 mo., %                                                          | 48.5                                      | 44.0 - 53.0 | 45.0                                                               | 36.0 - 54.1 | 41.6                                                                  | 34.8 - 48.4 | ns          | ns          |
| Any visits to parks or community centers that included a service for depression, among visited (N=305), %         | 12.1                                      | 7.9 - 16.3  | 25.4                                                               | 14.6 - 36.1 | 18.2                                                                  | 10.0 - 26.4 | .01         | ns          |

*Note:* adjusted analyses used multiply imputed data and weighted for eligible sample for enrollment and survey response; logistic regression models for binary variables or log-linear regression models for count variables adjusted for age and sex and accounted for clustering (clients within programs).

**Appendix C. Stratified analysis of substance abuse history version 1 - data limited to clients screened from substance abuse or social community agencies**

Analyses used substance abuse status version one, compared individuals screened from substance abuse agencies with individuals screened from social community agencies (social services, faith-based agencies, parks, and community centers) with or without a recent substance abuse history defined as substance abuse or substance dependence by MINI or receiving substance abuse services in the prior 6 months from an outpatient substance abuse agency self-help group or residential treatment program.

**Table C1. Demographic characteristics of clients screened with depressive symptoms, by substance abuse status (version 1)**

| Characteristic                   | Overall<br>(N=503) |                     | Clients from<br>substance abuse<br>agencies<br>(N=217) |                     | Clients from social<br>community<br>agencies with<br>substance abuse<br>history<br>(N=99) |                     | Clients from social<br>community<br>agencies without<br>substance abuse<br>history<br>(N=187) |                     | P <sup>†</sup> |
|----------------------------------|--------------------|---------------------|--------------------------------------------------------|---------------------|-------------------------------------------------------------------------------------------|---------------------|-----------------------------------------------------------------------------------------------|---------------------|----------------|
|                                  | No.                | Weighted<br>Mean, % | No.                                                    | Weighted<br>Mean, % | No.                                                                                       | Weighted<br>Mean, % | No.                                                                                           | Weighted<br>Mean, % |                |
| Age (M±SD)                       |                    | 46.5 ± 13.4         |                                                        | 42.5 ± 12.0         |                                                                                           | 49.4 ± 11.9         |                                                                                               | 49.3 ± 14.4         | .03            |
| Female                           | 287                | 56                  | 101                                                    | 46                  | 50                                                                                        | 50                  | 136                                                                                           | 71                  | <.001          |
| Married or living with a partner | 105                | 21                  | 49                                                     | 23                  | 9                                                                                         | 8                   | 47                                                                                            | 25                  | .003           |
| Race/Ethnicity                   |                    |                     |                                                        |                     |                                                                                           |                     |                                                                                               |                     | ns             |
| Hispanic                         | 161                | 33                  | 67                                                     | 32                  | 22                                                                                        | 22                  | 72                                                                                            | 40                  |                |
| Black or African American        | 270                | 52                  | 126                                                    | 57                  | 59                                                                                        | 57                  | 85                                                                                            | 43                  |                |
| Non-Hispanic white               | 56                 | 12                  | 16                                                     | 8                   | 16                                                                                        | 18                  | 24                                                                                            | 14                  |                |
| Other (API/Native/other)         | 16                 | 4                   | 8                                                      | 4                   | 2                                                                                         | 3                   | 6                                                                                             | 4                   |                |
| Less than high school            | 191                | 38                  | 88                                                     | 40                  | 26                                                                                        | 27                  | 77                                                                                            | 41                  | .004           |
| Born US                          | 394                | 78                  | 189                                                    | 87                  | 86                                                                                        | 88                  | 119                                                                                           | 62                  | <.001          |
| Income under poverty level       | 365                | 72                  | 162                                                    | 75                  | 76                                                                                        | 76                  | 127                                                                                           | 67                  | ns             |

*Note.* Data were multiply imputed at item level and percentage and means were weighted for eligible sample for enrollment and survey response. Percentages may not add up to 100% due to rounding.

<sup>†</sup>The statistics were based on Wald Chi-square test for comparing differences across three categories account for clustering (clients within programs). There was 2 degree of freedom for all of the characteristics listed with the exception of race/ethnicity, which had 6 degrees of freedom.

**Table C2. Social and clinical needs of clients with depressive symptoms, by substance abuse status (version 1) adjusted for age and sex**

| Variables                                                       | Adjusted Estimates                                |             |                                                                                |             |                                                                                    |             | Test        |             |
|-----------------------------------------------------------------|---------------------------------------------------|-------------|--------------------------------------------------------------------------------|-------------|------------------------------------------------------------------------------------|-------------|-------------|-------------|
|                                                                 | (a) Clients from substance abuse agencies (n=217) |             | (b) Clients from social community agencies with substance abuse history (n=99) |             | (c) Clients from social community agencies without substance abuse history (n=187) |             | (b) vs. (a) | (c) vs. (b) |
|                                                                 | Estimate                                          | 95% CI      | Estimate                                                                       | 95% CI      | Estimate                                                                           | 95% CI      | P           | P           |
| <i>Social needs</i>                                             |                                                   |             |                                                                                |             |                                                                                    |             |             |             |
| Has health insurance, %                                         | 36.0                                              | 23.0 - 49.0 | 44.1                                                                           | 31.1 - 57.1 | 52.0                                                                               | 40.6 - 63.4 | ns          | ns          |
| Homeless, %                                                     | 9.4                                               | 3.9 - 14.9  | 34.3                                                                           | 12.9 - 55.8 | 15.3                                                                               | 2.5 - 28.1  | .008        | .021        |
| Currently employed, %                                           | 9.9                                               | 5.7 - 14.0  | 19.5                                                                           | 9.7 - 29.3  | 29.7                                                                               | 21.4 - 37.9 | .046        | .049        |
| Arrested or on probation at any time past 6 mo., %              | 43.0                                              | 33.8 - 52.1 | 24.8                                                                           | 14.7 - 34.8 | 8.0                                                                                | 1.9 - 14.1  | .013        | .003        |
| Evicted or had your house foreclosed past 6 mo., %              | 21.8                                              | 14.2 - 29.4 | 16.0                                                                           | 6.2 - 25.9  | 10.0                                                                               | 4.1 - 15.9  | ns          | ns          |
| Witnessed someone being beaten, abused, or killed past 6 mo., % | 19.7                                              | 13.5 - 26.0 | 20.6                                                                           | 13.3 - 27.8 | 9.5                                                                                | 4.2 - 14.8  | ns          | .006        |
| Lost custody of any children in the past 6 mo., %               | 8.9                                               | 4.4 - 13.4  | 4.2                                                                            | -1.0 - 9.4  | .9                                                                                 | -.3 - 2.1   | ns          | ns          |
| <i>Clinical characteristics</i>                                 |                                                   |             |                                                                                |             |                                                                                    |             |             |             |
| PHQ-8 score, mean                                               | 15.1                                              | 14.5 - 15.8 | 15.3                                                                           | 14.3 - 16.2 | 14.7                                                                               | 13.9 - 15.5 | ns          | ns          |
| Number of chronic conditions (from list of 18), mean            | 3.1                                               | 2.5 - 3.7   | 3.4                                                                            | 2.8 - 4.0   | 3.6                                                                                | 3.1 - 4.0   | ns          | ns          |
| # cigarettes smoked per day last 7 days, mean                   | 6.9                                               | 5.3 - 8.5   | 6.6                                                                            | 4.9 - 8.4   | 4.4                                                                                | 2.8 - 6.0   | ns          | ns          |
| <i>Quality of life and Function scores</i>                      |                                                   |             |                                                                                |             |                                                                                    |             |             |             |
| General health, mean                                            | 3.4                                               | 3.2 - 3.6   | 3.4                                                                            | 3.2 - 3.7   | 3.7                                                                                | 3.5 - 3.9   | ns          | ns          |
| PCS-12, mean                                                    | 40.5                                              | 39.4 - 41.5 | 38.8                                                                           | 37.8 - 39.9 | 39.5                                                                               | 38.4 - 40.7 | .044        | ns          |
| MCS-12, mean                                                    | 39.0                                              | 38.1 - 39.9 | 38.2                                                                           | 36.8 - 39.6 | 40.4                                                                               | 39.3 - 41.5 | ns          | .003        |
| <i>Probable mental health diagnosis</i>                         |                                                   |             |                                                                                |             |                                                                                    |             |             |             |
| Current major depressive episode or dysthymia <sup>†</sup> , %  | 52.7                                              | 44.3 - 61.1 | 62.2                                                                           | 52.3 - 72.2 | 44.6                                                                               | 37.4 - 51.9 | ns          | .005        |
| 12-month depressive disorder <sup>†</sup> , %                   | 63.7                                              | 56.4 - 71.0 | 74.6                                                                           | 65.6 - 83.6 | 50.9                                                                               | 43.5 - 58.3 | ns          | <.001       |
| Lifetime psychosis or mania <sup>#</sup> , %                    | 54.6                                              | 46.4 - 62.8 | 50.3                                                                           | 37.9 - 62.7 | 27.3                                                                               | 19.1 - 35.4 | ns          | .001        |
| Any current or recent anxiety disorder <sup>††</sup> , %        | 54.9                                              | 49.3 - 60.5 | 48.1                                                                           | 34.9 - 61.3 | 35.8                                                                               | 27.7 - 43.9 | ns          | ns          |
| <i>Probable substance abuse diagnosis</i>                       |                                                   |             |                                                                                |             |                                                                                    |             |             |             |
| Misused any drugs in past 12 mo. <sup>‡</sup> , %               | 66.5                                              | 59.1 - 74.0 | 55.3                                                                           | 45.8 - 64.9 | 8.1                                                                                | 3.5 - 12.6  | ns          | <.001       |

**Table C2. Social and clinical needs of clients with depressive symptoms, by substance abuse status (version 1) adjusted for age and sex**

| Variables                                                   | Adjusted Estimates                                |             |                                                                                |             |                                                                                    |             | Test        |             |
|-------------------------------------------------------------|---------------------------------------------------|-------------|--------------------------------------------------------------------------------|-------------|------------------------------------------------------------------------------------|-------------|-------------|-------------|
|                                                             | (a) Clients from substance abuse agencies (n=217) |             | (b) Clients from social community agencies with substance abuse history (n=99) |             | (c) Clients from social community agencies without substance abuse history (n=187) |             | (b) vs. (a) | (c) vs. (b) |
|                                                             | Estimate                                          | 95% CI      | Estimate                                                                       | 95% CI      | Estimate                                                                           | 95% CI      | P           | P           |
| AUDIT-C score (alcohol screen for hazardous drinkers), mean | 2.5                                               | 2.0 - 2.9   | 2.3                                                                            | 1.7 - 2.9   | 1.3                                                                                | 1.0 - 1.6   | ns          | .002        |
| Hazardous drinker or alcohol use disorder <sup>§</sup> , %  | 30.0                                              | 24.6 - 35.4 | 34.6                                                                           | 24.1 - 45.1 | 16.8                                                                               | 10.6 - 23.1 | ns          | .003        |

*Note:* adjusted analyses used multiply imputed data and weighted for eligible sample for enrollment and survey response; logistic regression models for binary variables or linear regression models for continuous variables adjusted for age and sex and accounted for clustering (clients within programs).

<sup>†</sup>Panic attacks, Post-Traumatic Stress Disorder, Social Anxiety Disorder. <sup>‡</sup>Based on Mini International Neuropsychiatric Interview. <sup>§</sup>Based on a positive AUDIT-C score, male AUDIT-C $\geq$ 4, female $\geq$ 3. <sup>#</sup>derived from MINI and from baseline client interview.



**Table C3. Past six-month utilization of health services (emergency room, hospitalization, mental health, primary care, substance abuse, social services, faith-based, parks and community centers) among clients with depressive symptoms, by substance abuse status (version 1) adjusted for age and sex**

| Variables                                                                                               | Adjusted Estimates                        |             |                                                                         |             |                                                                            |             | Test        |             |
|---------------------------------------------------------------------------------------------------------|-------------------------------------------|-------------|-------------------------------------------------------------------------|-------------|----------------------------------------------------------------------------|-------------|-------------|-------------|
|                                                                                                         | (a) Clients from substance abuse agencies |             | (b) Clients from social community agencies with substance abuse history |             | (c) Clients from social community agencies without substance abuse history |             | (b) vs. (a) | (c) vs. (b) |
|                                                                                                         | Estimate                                  | 95% CI      | Estimate                                                                | 95% CI      | Estimate                                                                   | 95% CI      | P           | P           |
| <i>Emergency room visits</i>                                                                            |                                           |             |                                                                         |             |                                                                            |             |             |             |
| Any emergency room visits for any health problems in the past 6 mo., %                                  | 59.1                                      | 50.5 - 67.6 | 61.5                                                                    | 50.6 - 72.5 | 41.7                                                                       | 32.3 - 51.1 | ns          | .01         |
| # of emergency room visits for any health problems in the past 6 mo., among visited (N=266), mean       | 3.8                                       | 2.9 - 4.7   | 3.3                                                                     | 2.7 - 3.8   | 3.0                                                                        | 2.6 - 3.5   | ns          | ns          |
| Any emergency room visits for alcohol, drug, or mental/emotional problem in the past 6 mo., %           | 35.5                                      | 28.3 - 42.6 | 36.6                                                                    | 27.0 - 46.2 | 15.2                                                                       | 9.2 - 21.2  | ns          | <.001       |
| # of emergency room visits for alcohol, drug, or mental/emotional problems, among visited (N=142), mean | 3.1                                       | 2.4 - 3.7   | 2.9                                                                     | 2.2 - 3.6   | 2.3                                                                        | 1.8 - 2.8   | ns          | ns          |
| <i>Hospitalizations and length of stay for alcohol, drug, or mental/emotional problem</i>               |                                           |             |                                                                         |             |                                                                            |             |             |             |
| Any overnight stay in hospital for alcohol, drug, or mental/emotional problem in the past 6 mo., %      | 21.7                                      | 14.0 - 29.4 | 23.6                                                                    | 14.7 - 32.5 | 6.7                                                                        | 2.4 - 10.9  | ns          | <.001       |
| # of nights stay for alcohol, drug, or mental/emotional problem past 6 mo, among visited (N=80), mean   | 11.0                                      | 2.4 - 19.7  | 7.6                                                                     | 5.3 - 9.8   | 7.1                                                                        | 2.6 - 11.5  | ns          | ns          |
| <i>Mental Health Specialty Visit</i>                                                                    |                                           |             |                                                                         |             |                                                                            |             |             |             |
| Any mental health specialty in the past 6 mo., %                                                        | 56.4                                      | 48.8 - 64.1 | 69.8                                                                    | 56.5 - 83.2 | 39.4                                                                       | 27.8 - 51.1 | ns          | <.001       |
| # of mental health outpatient visits, among visited (N=266), mean                                       | 16.3                                      | 11.0 - 21.5 | 12.8                                                                    | 9.0 - 16.5  | 9.8                                                                        | 7.4 - 12.2  | ns          | ns          |
| Any medication or counseling for emotional or mental health problem in the past 6 mo., %                | 55.2                                      | 47.7 - 62.7 | 66.1                                                                    | 53.1 - 79.1 | 35.6                                                                       | 24.8 - 46.4 | ns          | <.001       |
| <i>Primary care visit</i>                                                                               |                                           |             |                                                                         |             |                                                                            |             |             |             |
| Any primary care visit for any problem in the past 6 mo., %                                             | 58.3                                      | 47.4 - 69.3 | 67.3                                                                    | 58.7 - 75.8 | 69.7                                                                       | 62.9 - 76.4 | ns          | ns          |
| # of visits to primary care provider in the past 6 mo., among visited (N=321), mean                     | 7.3                                       | 3.4 - 11.1  | 5.3                                                                     | 3.7 - 6.9   | 5.2                                                                        | 4.1 - 6.3   | ns          | ns          |

**Table C3. Past six-month utilization of health services (emergency room, hospitalization, mental health, primary care, substance abuse, social services, faith-based, parks and community centers) among clients with depressive symptoms, by substance abuse status (version 1) adjusted for age and sex**

| Variables                                                                                                         | Adjusted Estimates                        |             |                                                                         |             |                                                                            |             | Test        |             |
|-------------------------------------------------------------------------------------------------------------------|-------------------------------------------|-------------|-------------------------------------------------------------------------|-------------|----------------------------------------------------------------------------|-------------|-------------|-------------|
|                                                                                                                   | (a) Clients from substance abuse agencies |             | (b) Clients from social community agencies with substance abuse history |             | (c) Clients from social community agencies without substance abuse history |             | (b) vs. (a) | (c) vs. (b) |
|                                                                                                                   | Estimate                                  | 95% CI      | Estimate                                                                | 95% CI      | Estimate                                                                   | 95% CI      | P           | P           |
| Any primary care visits that included a service for depression, among visited (N=321), %                          | 60.6                                      | 50.5 - 70.7 | 65.2                                                                    | 53.7 - 76.7 | 54.3                                                                       | 44.4 - 64.2 | ns          | ns          |
| <i>Social services agency visit</i>                                                                               |                                           |             |                                                                         |             |                                                                            |             |             |             |
| Any social services visit in the past 6 mo., %                                                                    | 52.9                                      | 46.9 - 59.0 | 67.0                                                                    | 55.5 - 78.6 | 55.6                                                                       | 46.3 - 64.9 | ns          | ns          |
| Any visits to social services agency that included a service for depression, among visited (N=285), %             | 47.0                                      | 35.7 - 58.2 | 65.2                                                                    | 52.5 - 78.0 | 43.7                                                                       | 31.5 - 55.9 | .04         | .021        |
| <i>Faith-based visit (e.g., church, temple)</i>                                                                   |                                           |             |                                                                         |             |                                                                            |             |             |             |
| Any faith-based visit in the past 6 mo., %                                                                        | 53.6                                      | 42.7 - 64.5 | 55.2                                                                    | 46.2 - 64.2 | 65.7                                                                       | 57.4 - 74.1 | ns          | ns          |
| Any visits to religious places that included a service for depression in the past 6 mo., among visited (N=297), % | 43.9                                      | 32.5 - 55.3 | 40.4                                                                    | 28.4 - 52.4 | 37.7                                                                       | 27.6 - 47.8 | ns          | ns          |
| <i>Parks and community center (including senior centers) visits</i>                                               |                                           |             |                                                                         |             |                                                                            |             |             |             |
| Any parks or community center visit in the past 6 mo., %                                                          | 48.0                                      | 43.1 - 52.8 | 58.0                                                                    | 48.7 - 67.3 | 54.9                                                                       | 46.0 - 63.7 | ns          | ns          |
| Any visits to parks or community centers that included a service for depression, among visited (N=265), %         | 12.2                                      | 7.6 - 16.9  | 19.4                                                                    | 7.9 - 31.0  | 7.1                                                                        | 2.9 - 11.3  | ns          | .031        |

Note: adjusted analyses used multiply imputed data and weighted for eligible sample for enrollment and survey response; logistic regression models for binary variables or log-linear regression models for count variables adjusted for age and sex and accounted for clustering (clients within programs).

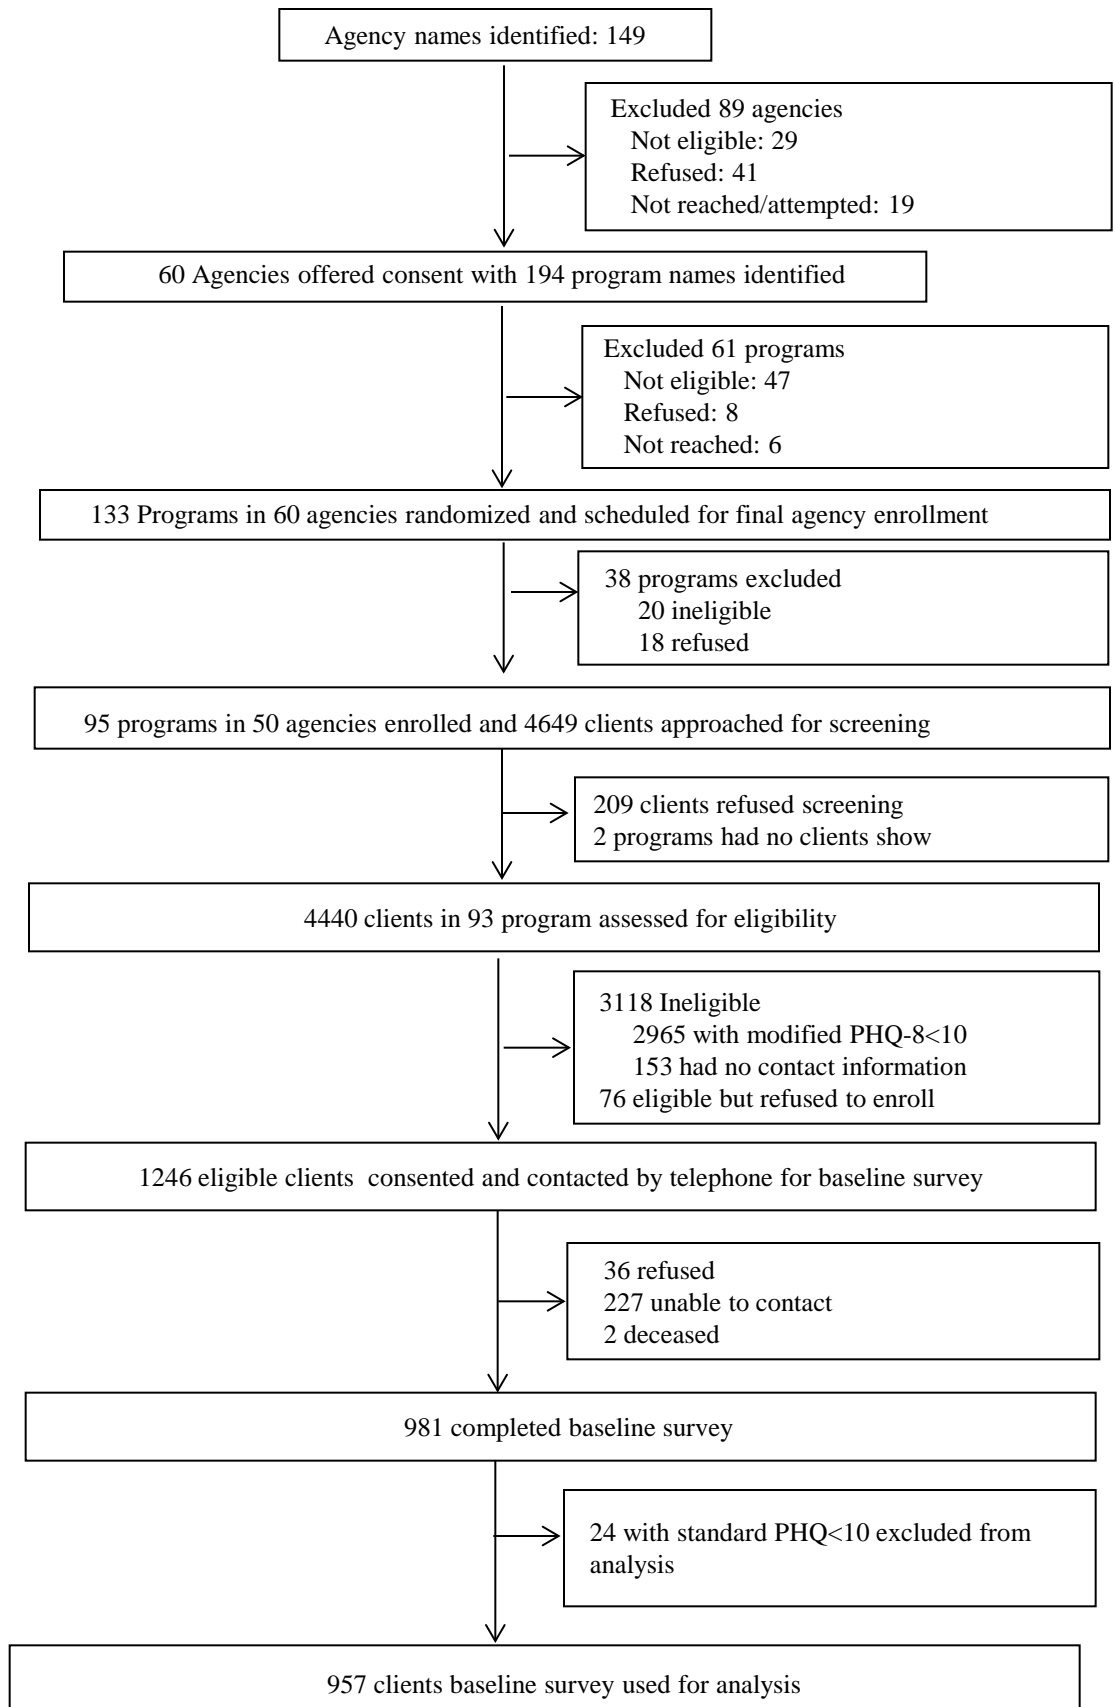

**Figure. Trial profile**
